# Supplementary material
Source: PubMed Central journal article supplement (PMC7187610)
Supplement: AAC.01639-19-s0001.pdf [file AAC.01639-19-s0001.pdf]

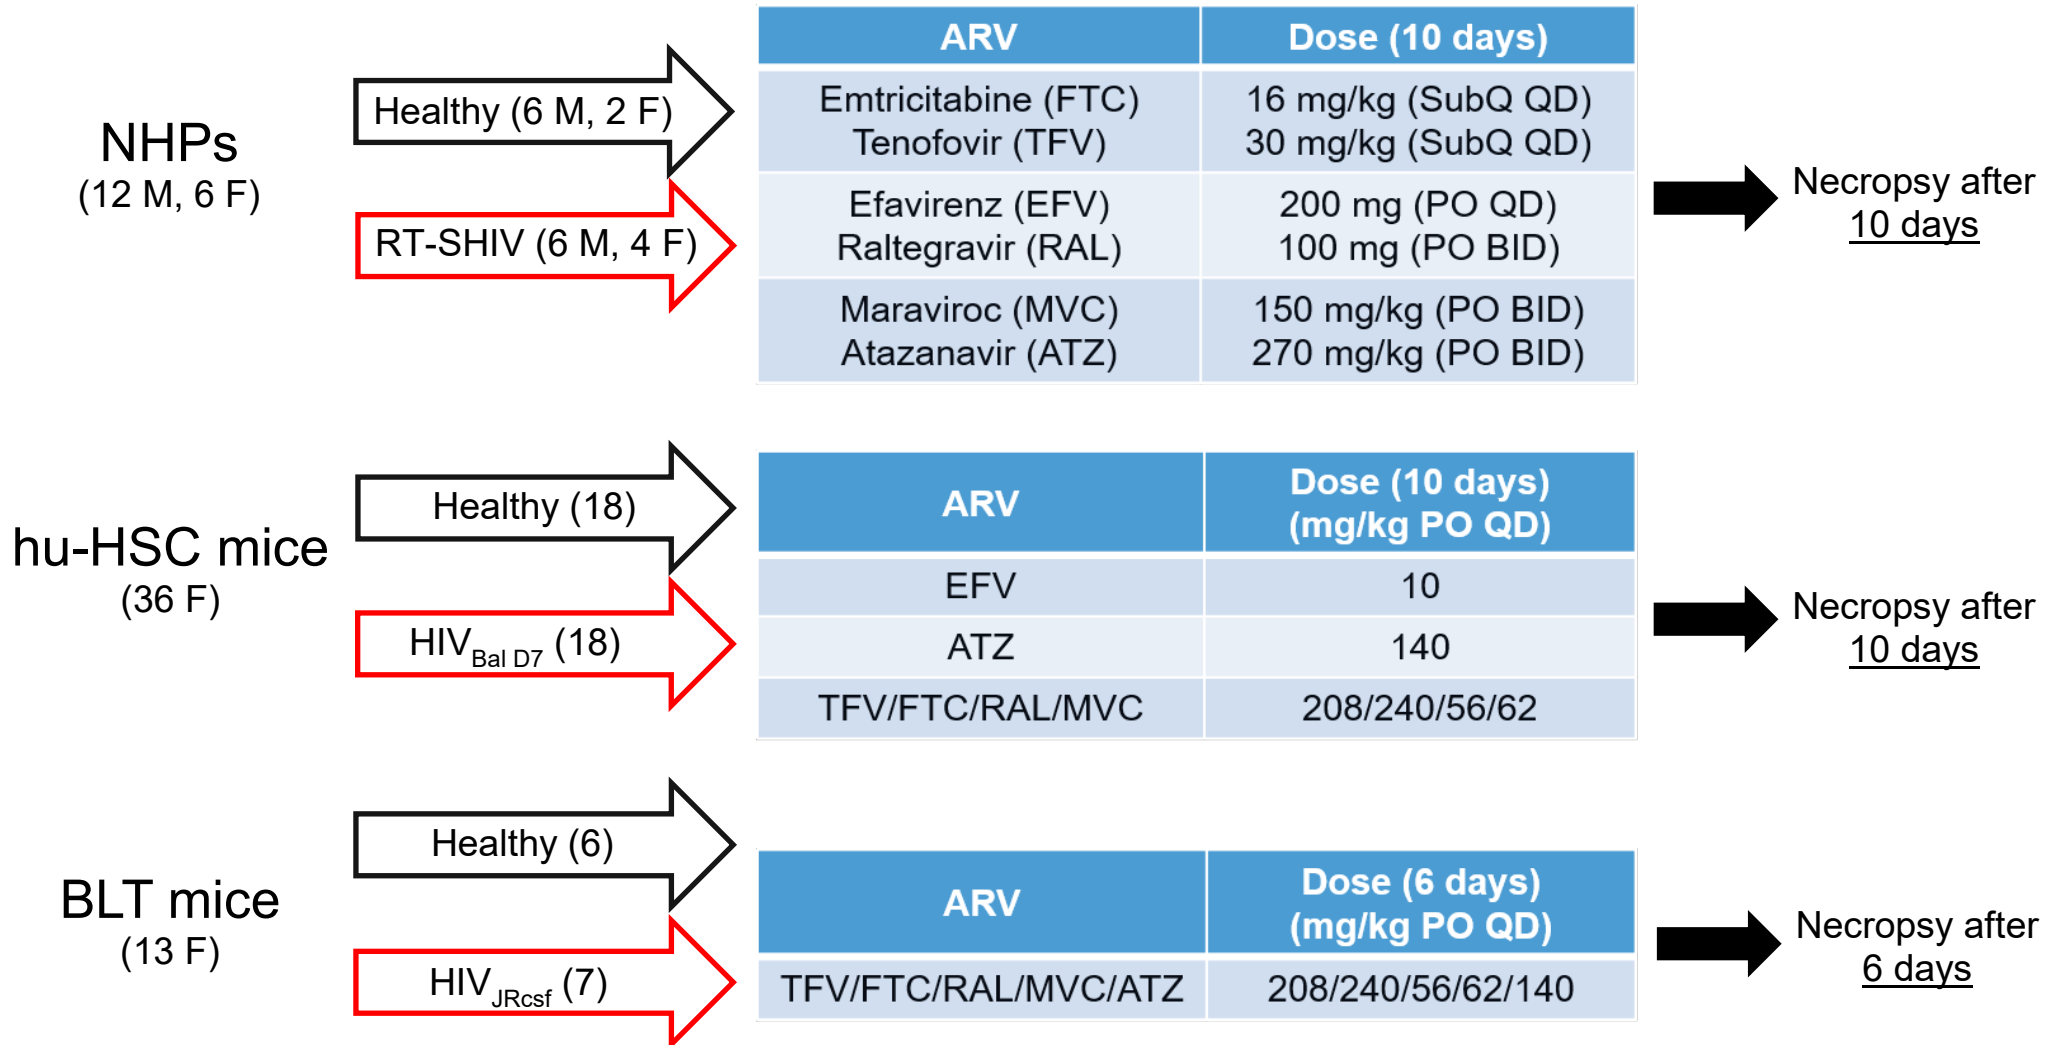

**FIG S1** Antiretroviral doses and combinations in preclinical species. Abbreviations: ARV, antiretroviral; NHP, nonhuman primates; BLT, bone marrow-liver-thymus. Dosing abbreviations: SubQ, subcutaneous; QD, daily; PO, by mouth; BID, twice daily. BLT mice were not dosed with EFV due to toxicity concerns.

**Table S1** Physicochemical properties of analyzed ARVs and the influence of drug transporter proteins (1–9)

| ARV | Physicochemical Properties |                  |                           | Drug Transporter Affinities |                       |         |
|-----|----------------------------|------------------|---------------------------|-----------------------------|-----------------------|---------|
|     | Log P                      | pKa              | Percent protein bound (%) | Substrate                   | Inhibitor             | Inducer |
| FTC | -0.5                       | 2.65             | <4                        | MRP1, ENT1                  | MRP1, MRP2            | PGP     |
| TFV | -1.6                       | 3.75             | <5                        | MRP2, MRP4, BCRP, ENT1      | MRP1, MRP2            |         |
| EFV | 4.6                        | 10.2             | 99.5                      | BCRP                        | MRP1, MRP2, PGP, BCRP | PGP     |
| ATV | 4.5                        | 4.7 <sup>+</sup> | 86                        | MRP1, MRP2, PGP, OATP2A1    | PGP, BCRP, OATP2A1    | PGP     |
| RAL | 1.1                        | 6.3 <sup>¶</sup> | 83                        | PGP, BCRP                   |                       |         |
| MVC | 5.1                        | 7.3              | 76                        | MRP2, PGP                   | PGP                   |         |

ARV, antiretroviral; FTC, emtricitabine; TFV, tenofovir; EFV, efavirenz; ATV, atazanavir; MVC, maraviroc; RAL, raltegravir.

+ indicates pKa value of ATV was derived from Clinical Pharmacology and Biopharmaceutics Review Application Number 21-567, which can be accessed here: [https://www.accessdata.fda.gov/drugsatfda\\_docs/nda/2003/21-567\\_Reyataz\\_BioPharmr\\_P1.pdf](https://www.accessdata.fda.gov/drugsatfda_docs/nda/2003/21-567_Reyataz_BioPharmr_P1.pdf)

¶ indicates pKa value of RAL was derived from Clinical Pharmacology and Biopharmaceutics Review Application Number 203045Orig1s000, which can be accessed here: [https://www.accessdata.fda.gov/drugsatfda\\_docs/nda/2011/203045Orig1s000ClinPharmR.pdf](https://www.accessdata.fda.gov/drugsatfda_docs/nda/2011/203045Orig1s000ClinPharmR.pdf)

Percent protein bound values derived from individual package inserts available at: <https://dailymed.nlm.nih.gov/dailymed/>

### Supplemental Materials References

1. Thompson CG, Fallon JK, Mathews M, Charlins P, Remling-Mulder L, Kovarova M, Adamson L, Srinivas N, Schauer A, Sykes C, Luciw P, Garcia JV, Akkina R, Smith PC, Kashuba ADM. 2017. Multimodal analysis of drug transporter expression in gastrointestinal tissue. *AIDS* 31:1669–1678.
2. Burgunder E, Fallon JK, White N, Schauer AP, Sykes C, Remling-Mulder L, Kovarova M, Adamson L, Luciw P, Garcia JV, Akkina R, Smith PC, Kashuba ADM. 2019. Antiretroviral Drug Concentrations in Lymph Nodes: A Cross-Species Comparison of the Effect of Drug Transporter Expression, Viral Infection, and Sex in Humanized Mice, Nonhuman Primates, and Humans. *J. Pharmacol. Exp. Ther.* 370:360–368.
3. Huang Y, Hoque MT, Jenabian M-A, Vyboh K, Whyte S-K, Sheehan NL, Brassard P, Bélanger M, Chomont N, Fletcher CV, Routy J-P, Bendayan R. 2016. Antiretroviral drug transporters and metabolic enzymes in human testicular tissue: potential contribution to HIV-1 sanctuary site. *J. Antimicrob. Chemother.* 71:1954–1965.
4. Minuesa G, Huber-Ruano I, Pastor-Anglada M, Koepsell H, Clotet B, Martinez-Picado J. 2011. Drug uptake transporters in antiretroviral therapy. *Pharmacol. Ther.* 132:268–279.
5. Nicol MR, Fedoriw Y, Mathews M, Prince HMA, Patterson KB, Geller E, Mollan K, Mathews S, Kroetz DL, Kashuba ADM. 2014. Expression of six drug transporters in vaginal, cervical, and colorectal tissues: Implications for drug disposition in HIV prevention. *J. Clin. Pharmacol.* 54:574–583.
6. Bousquet L, Pruvost A, Didier N, Farinotti R, Mabondzo A. 2008. Emtricitabine: Inhibitor and substrate of multidrug resistance associated protein. *Eur J Pharm Sci* 35:247–256.
7. Anderson PL, Kiser JJ, Gardner EM, Rower JE, Meditz A, Grant RM. 2011. Pharmacological considerations for tenofovir and emtricitabine to prevent HIV infection. *J. Antimicrob. Chemother.* 66:240–250.
8. Thompson CG, Sedykh A, Nicol MR, Muratov E, Fourches D, Tropsha A, Kashuba ADM. 2014. Short communication: cheminformatics analysis to identify predictors of antiviral drug penetration into the female genital tract. *AIDS Res. Hum. Retroviruses* 30:1058–1064.
9. Kashuba AD, Dyer JR, Kramer LM, Raasch RH, Eron JJ, Cohen MS. 1999. Antiretroviral-drug concentrations in semen: implications for sexual transmission of human immunodeficiency virus type 1. *Antimicrob. Agents Chemother.* 43:1817–1826.
